# Supplementary material
Source: publisher site journal article supplement (https://www.dovepress.com/article/266386)
Supplement: Supplementary file 1 [file get_supplementary_file.php]

**Supplementary Material 1** Predictors of infant mortality in nine Asian countries: log-linear regression estimates with control of corruption

| Variables | **ln(Infant mortality)** | | | |
| --- | --- | --- | --- | --- |
| (1.1) | (1.2) | (1.3) | (1.4) |
| **OECD** | **Non-OECD** | **OECD** | **Non-OECD** |
|  |  |  |  |  |
| CHE as a share of GDP | -0.0915 | -0.115** |  |  |
|  | (0.0784) | (0.0476) |  |  |
| ln(CHE per capita) |  |  | -0.232 | 0.0261 |
|  |  |  | (0.334) | (0.0872) |
| Control of corruption [1; 6] | -0.201 | -0.383*** | -0.0504 | -0.514** |
|  | (0.150) | (0.0960) | (0.704) | (0.216) |
| Control of corruption*CHE/GDP | 0.0224 | 0.114*** |  |  |
|  | (0.0203) | (0.0281) |  |  |
| Control of corruption*ln(CHE pc) |  |  | 0.00427 | 0.0994** |
|  |  |  | (0.0913) | (0.0387) |
| ln(Unsafe water drinking) | -0.473*** | 0.0982*** | -0.249 | 0.0974*** |
|  | (0.142) | (0.0160) | (0.255) | (0.0168) |
| ln(CO2 per capita) | 0.197 | 0.205*** | 0.467* | 0.226*** |
|  | (0.181) | (0.0564) | (0.232) | (0.0661) |
| ln(Animal protein consum. pc) | 15.41*** | 1.137 | 3.006 | -0.605 |
|  | (5.483) | (0.914) | (11.65) | (1.509) |
| ln(Animal protein consum. pc)Sq | -1.514*** | -0.116 | -0.300 | 0.0347 |
|  | (0.539) | (0.108) | (1.139) | (0.179) |
| ln(Plant protein consum. pc) | 163.3*** | 16.66** | 111.8** | 6.316 |
|  | (32.45) | (6.489) | (49.01) | (7.979) |
| (ln(Plant protein consum. pc))Sq | -15.42*** | -1.722*** | -10.57** | -0.655 |
|  | (3.073) | (0.639) | (4.643) | (0.789) |
| ln(Carbohydrates consum. pc) | -146.4*** | 49.27*** | -98.41 | 58.51*** |
|  | (34.89) | (16.83) | (57.43) | (19.02) |
| (ln(Carbohydrates consum. pc))Sq | 9.657*** | -3.273*** | 6.460 | -3.920*** |
|  | (2.308) | (1.122) | (3.810) | (1.267) |
| ln(Fat consumption pc) | -13.13 | -3.648 | 2.932 | 0.0157 |
|  | (15.30) | (3.978) | (20.77) | (5.848) |
| (ln(Fat consumption pc))Sq | 0.969 | 0.271 | -0.254 | -0.0135 |
|  | (1.141) | (0.322) | (1.551) | (0.470) |
| ln(GDP per capita) | -1.949*** | -0.412*** | -1.340** | -0.767*** |
|  | (0.300) | (0.0606) | (0.605) | (0.139) |
| Unemployment | -0.0244** | -0.0184*** | -0.0234 | -0.0185** |
|  | (0.0109) | (0.00659) | (0.0232) | (0.00796) |
| ln(Population density) | 4.859** | -0.235** | 3.247 | 0.0950 |
|  | (1.788) | (0.0921) | (2.728) | (0.118) |
| Urbanization | -0.0119* | -0.0271*** | -0.00905 | -0.0208*** |
|  | (0.00642) | (0.00237) | (0.00896) | (0.00321) |
|  |  |  |  |  |
| Constant | 122.3 | -207.1*** | 60.98 | -221.5*** |
|  | (85.23) | (66.05) | (112.8) | (76.44) |
|  |  |  |  |  |
| Observations | 44 | 154 | 36 | 126 |
| R-squared | 0.997 | 0.977 | 0.995 | 0.968 |
| Number of countries | 2 | 7 | 2 | 7 |

Standard errors in parentheses. *** <0.01, ** p<0.05, * p<0.1.**Supplementary Material 2** Predictors of under-five mortality in nine Asian countries: log-linear regression estimates with control of corruption

| Variables | **ln(Under-five mortality)** | | | |
| --- | --- | --- | --- | --- |
| (1.1) | (1.2) | (1.3) | (1.4) |
| **OECD** | **Non-OECD** | **OECD** | **Non-OECD** |
|  |  |  |  |  |
| CHE as a share of GDP | -0.00382 | -0.145*** |  |  |
|  | (0.113) | (0.0507) |  |  |
| ln(CHE per capita) |  |  | -0.117 | 0.0340 |
|  |  |  | (0.536) | (0.0960) |
| Control of corruption [1; 6] | -0.0993 | -0.461*** | 0.00778 | -0.556** |
|  | (0.216) | (0.102) | (1.128) | (0.238) |
| Control of corruption*CHE/GDP | 0.00387 | 0.137*** |  |  |
|  | (0.0291) | (0.0300) |  |  |
| Control of corruption*ln(CHE pc) |  |  | -0.00367 | 0.107** |
|  |  |  | (0.146) | (0.0427) |
| ln(Unsafe water drinking) | -0.525** | 0.100*** | -0.233 | 0.0994*** |
|  | (0.205) | (0.0170) | (0.409) | (0.0185) |
| ln(CO2 per capita) | 0.214 | 0.217*** | 0.370 | 0.234*** |
|  | (0.261) | (0.0601) | (0.371) | (0.0729) |
| ln(Animal protein consum. pc) | 13.32 | 0.856 | 10.68 | -1.674 |
|  | (7.891) | (0.974) | (18.67) | (1.662) |
| ln(Animal protein consum. pc)Sq | -1.310 | -0.0885 | -1.057 | 0.151 |
|  | (0.775) | (0.115) | (1.825) | (0.197) |
| ln(Plant protein consum. pc) | 130.1** | 20.35*** | 44.27 | 6.550 |
|  | (46.71) | (6.916) | (78.55) | (8.790) |
| (ln(Plant protein consum. pc))Sq | -12.29** | -2.092*** | -4.181 | -0.679 |
|  | (4.423) | (0.681) | (7.440) | (0.869) |
| ln(Carbohydrates consum. pc) | -127.9** | 51.32*** | -47.89 | 61.15*** |
|  | (50.22) | (17.94) | (92.03) | (20.96) |
| (ln(Carbohydrates consum. pc))Sq | 8.465** | -3.416*** | 3.165 | -4.103*** |
|  | (3.322) | (1.196) | (6.106) | (1.395) |
| ln(Fat consumption pc) | 1.053 | -3.287 | 11.71 | 0.942 |
|  | (22.03) | (4.240) | (33.28) | (6.443) |
| (ln(Fat consumption pc))Sq | -0.0923 | 0.237 | -0.906 | -0.0930 |
|  | (1.642) | (0.343) | (2.485) | (0.518) |
| ln(GDP per capita) | -2.258*** | -0.437*** | -1.574 | -0.839*** |
|  | (0.432) | (0.0646) | (0.969) | (0.153) |
| Unemployment | -0.0323** | -0.0186*** | -0.0264 | -0.0206** |
|  | (0.0156) | (0.00703) | (0.0372) | (0.00877) |
| ln(Population density) | 5.471** | -0.324*** | 3.795 | 0.0491 |
|  | (2.573) | (0.0982) | (4.371) | (0.130) |
| Urbanization | -0.0109 | -0.0262*** | -0.0165 | -0.0194*** |
|  | (0.00924) | (0.00252) | (0.0144) | (0.00354) |
|  |  |  |  |  |
| Constant | 95.64 | -222.9*** | -3.875 | -230.8*** |
|  | (122.7) | (70.40) | (180.7) | (84.21) |
|  |  |  |  |  |
| Observations | 44 | 154 | 36 | 126 |
| R-squared | 0.993 | 0.977 | 0.988 | 0.966 |
| Number of countries | 2 | 7 | 2 | 7 |

Standard errors in parentheses. *** <0.01, ** p<0.05, * p<0.1.

**Supplementary Material 3** Predictors of healthy life expectancy in nine Asian countries: log-linear regression estimates with control of corruption

| Variables | **ln(Healthy life expectancy)** | | | |
| --- | --- | --- | --- | --- |
| (1.1) | (1.2) | (1.3) | (1.4) |
| **OECD** | **Non-OECD** | **OECD** | **Non-OECD** |
|  |  |  |  |  |
| CHE as a share of GDP | -0.000522 | 0.0517*** |  |  |
|  | (0.00628) | (0.00701) |  |  |
| ln(CHE per capita) |  |  | -0.00443 | 0.0254*** |
|  |  |  | (0.0170) | (0.00930) |
| Control of corruption [1; 6] | 0.00609 | 0.117*** | -0.0366 | 0.180*** |
|  | (0.0120) | (0.0141) | (0.0357) | (0.0230) |
| Control of corruption*CHE/GDP | 4.26e-05 | -0.0306*** |  |  |
|  | (0.00162) | (0.00414) |  |  |
| Control of corruption*ln(CHE pc) |  |  | 0.00534 | -0.0300*** |
|  |  |  | (0.00463) | (0.00413) |
| ln(Unsafe water drinking) | 0.0475*** | -0.00735*** | 0.0136 | -0.00513*** |
|  | (0.0114) | (0.00235) | (0.0130) | (0.00179) |
| ln(CO2 per capita) | -0.0143 | 6.56e-05 | -0.0403*** | -0.0127* |
|  | (0.0145) | (0.00830) | (0.0118) | (0.00706) |
| ln(Animal protein consum. pc) | -1.112** | -0.135 | -0.603 | 0.131 |
|  | (0.439) | (0.135) | (0.592) | (0.161) |
| ln(Animal protein consum. pc)Sq | 0.107** | 0.0166 | 0.0568 | -0.0113 |
|  | (0.0431) | (0.0159) | (0.0578) | (0.0191) |
| ln(Plant protein consum. pc) | -13.65*** | -1.279 | -6.681** | 2.106** |
|  | (2.599) | (0.955) | (2.489) | (0.851) |
| (ln(Plant protein consum. pc))Sq | 1.296*** | 0.114 | 0.634** | -0.216** |
|  | (0.246) | (0.0940) | (0.236) | (0.0842) |
| ln(Carbohydrates consum. pc) | 12.80*** | 7.993*** | 6.952** | 3.359 |
|  | (2.794) | (2.478) | (2.916) | (2.030) |
| (ln(Carbohydrates consum. pc))Sq | -0.848*** | -0.527*** | -0.460** | -0.218 |
|  | (0.185) | (0.165) | (0.193) | (0.135) |
| ln(Fat consumption pc) | 1.176 | 1.332** | -1.382 | 0.482 |
|  | (1.226) | (0.586) | (1.055) | (0.624) |
| (ln(Fat consumption pc))Sq | -0.0901 | -0.103** | 0.104 | -0.0383 |
|  | (0.0914) | (0.0474) | (0.0787) | (0.0502) |
| ln(GDP per capita) | 0.196*** | -0.0246*** | 0.124*** | 0.0333** |
|  | (0.0240) | (0.00892) | (0.0307) | (0.0148) |
| Unemployment | 0.00264*** | 0.000432 | 0.00121 | -0.00139 |
|  | (0.000869) | (0.000970) | (0.00118) | (0.000849) |
| ln(Population density) | -0.175 | 0.149*** | 0.0741 | 0.156*** |
|  | (0.143) | (0.0136) | (0.139) | (0.0126) |
| Urbanization | -0.000568 | 0.00356*** | -0.000339 | 0.00320*** |
|  | (0.000514) | (0.000348) | (0.000455) | (0.000343) |
|  |  |  |  |  |
| Constant | -10.00 | -27.54*** | 0.167 | -17.13** |
|  | (6.826) | (9.722) | (5.727) | (8.156) |
|  |  |  |  |  |
| Observations | 44 | 154 | 36 | 126 |
| R-squared | 0.997 | 0.951 | 0.998 | 0.960 |
| Number of countries | 2 | 7 | 2 | 7 |

Standard errors in parentheses. *** <0.01, ** p<0.05, * p<0.1.**Supplementary Material 4** Oxaca-Blinder decomposition of infant mortality in nine Asian countries: log-linear estimates with CHE per capita

| Variables | **ln(Infant mortality)** | | | | | | | |
| --- | --- | --- | --- | --- | --- | --- | --- | --- |
| Overall | Endowments | Coefficients | Interaction | Overall | Endowments | Coefficients | Interaction |
|  |  |  |  |  |  |  |  |  |
| CHE per capita |  | -0.939*** | 3.917** | 1.560** |  | -0.382* | 0.334 | 0.133 |
|  |  | (0.159) | (1.792) | (0.717) |  | (0.205) | (1.866) | (0.743) |
| Regulatory quality [1; 6] |  | -1.209*** | 4.711*** | 2.967*** |  |  |  |  |
|  |  | (0.207) | (1.438) | (0.914) |  |  |  |  |
| Regulatory quality* CHE pc |  | 2.505*** | -4.066*** | -5.031*** |  |  |  |  |
|  |  | (0.418) | (1.074) | (1.340) |  |  |  |  |
| Control of corruption [1; 6] |  | -0.447*** | 0.550 | -0.397 |  | -0.501 | 1.349 | 1.070 |
|  |  | (0.0740) | (1.428) | (1.031) |  | (0.367) | (1.175) | (0.934) |
| Control of corruption* CHE pc |  | -0.141 | 0.206 | 0.402 |  | 1.144 | -1.308 | -1.937 |
|  |  | (0.0888) | (0.194) | (0.376) |  | (0.700) | (0.919) | (1.364) |
| ln(Unsafe water drinking) |  | -0.552 | -8.601 | -1.306 |  | -0.476*** | -1.146 | 0.828 |
|  |  | (0.912) | (47.06) | (7.149) |  | (0.0853) | (1.316) | (0.951) |
| ln(CO2 per capita) |  | 0.352 | 3.901 | 1.231 |  | 0.0572 | 0.379** | 0.740** |
|  |  | (1.013) | (21.11) | (6.658) |  | (0.0955) | (0.192) | (0.370) |
| ln(Animal protein consum. pc) |  | 0.890 | 279.1 | 5.042 |  | -1.356 | 9.645 | 1.465 |
|  |  | (0.612) | (195.2) | (3.779) |  | (1.060) | (53.12) | (8.069) |
| ln(Animal protein consum. pc)Sq |  | -0.859 | -133.1 | -4.762 |  | 1.305 | -4.613 | -1.455 |
|  |  | (0.603) | (94.19) | (3.617) |  | (1.177) | (23.83) | (7.517) |
| ln(Plant protein consum. pc) |  | 0.439 | -490.4 | -0.845 |  | 2.125** | 310.1 | 5.602 |
|  |  | (0.719) | (345.0) | (1.429) |  | (0.871) | (229.7) | (4.415) |
| (ln(Plant protein consum. pc))Sq |  | -0.469 | 246.2 | 0.868 |  | -2.082** | -147.2 | -5.267 |
|  |  | (0.748) | (171.1) | (1.438) |  | (0.865) | (110.8) | (4.221) |
| ln(Carbohydrates consum. pc) |  | -0.566 | 13.87 | 0.777 |  | 0.0280 | -475.7 | -0.820 |
|  |  | (1.799) | (121.1) | (6.785) |  | (0.283) | (409.5) | (1.445) |
| (ln(Carbohydrates consum. pc))Sq |  | 0.835 | -10.46 | -1.190 |  | -0.0471 | 236.3 | 0.834 |
|  |  | (1.869) | (57.77) | (6.573) |  | (0.296) | (203.0) | (1.443) |
| ln(Fat consumption pc) |  | -0.538*** | -1.483 | -0.238 |  | -0.754 | -17.88 | -1.002 |
|  |  | (0.115) | (2.217) | (0.357) |  | (2.211) | (133.8) | (7.496) |
| (ln(Fat consumption pc))Sq |  | -0.0308*** | 0.112** | 0.0258** |  | 0.962 | 4.696 | 0.534 |
|  |  | (0.00959) | (0.0493) | (0.0131) |  | (2.295) | (63.98) | (7.279) |
| ln(GDP per capita) |  | 0.330*** | -3.713* | -0.620* |  | -0.824*** | -1.317 | -0.212 |
|  |  | (0.0417) | (2.152) | (0.361) |  | (0.148) | (3.351) | (0.539) |
| Unemployment |  | -0.632*** | 0.0458 | 0.0396 |  | -0.0407*** | 0.172*** | 0.0398** |
|  |  | (0.0696) | (0.400) | (0.346) |  | (0.0121) | (0.0567) | (0.0165) |
| ln(Population density) |  | -0.447*** | 0.550 | -0.397 |  | 0.372*** | -3.030 | -0.506 |
|  |  | (0.0740) | (1.428) | (1.031) |  | (0.0471) | (2.427) | (0.407) |
| Urbanization |  | -0.141 | 0.206 | 0.402 |  | -0.566*** | 0.221 | 0.191 |
|  |  | (0.0888) | (0.194) | (0.376) |  | (0.0780) | (0.422) | (0.365) |
| OECD group | 1.147*** |  |  |  | 1.147*** |  |  |  |
|  | (0.0550) |  |  |  | (0.0550) |  |  |  |
| Non-OECD group | 3.140*** |  |  |  | 3.140*** |  |  |  |
|  | (0.0694) |  |  |  | (0.0694) |  |  |  |
| Difference | -1.993*** |  |  |  | -1.993*** |  |  |  |
|  | (0.0885) |  |  |  | (0.0886) |  |  |  |
| Endowments | -1.032*** |  |  |  | -1.036*** |  |  |  |
|  | (0.126) |  |  |  | (0.186) |  |  |  |
| Coefficients | 0.517 |  |  |  | -1.193 |  |  |  |
|  | (1.365) |  |  |  | (1.152) |  |  |  |
| Interaction | -1.478 |  |  |  | 0.237 |  |  |  |
|  | (1.371) |  |  |  | (1.166) |  |  |  |
| Constant |  |  | 99.78 |  |  |  | 87.82 |  |
|  |  |  | (125.5) |  |  |  | (141.1) |  |
| Observations | 162 | 162 | 162 | 162 | 162 | 162 | 162 | 162 |

Standard errors in parentheses. *** <0.01, ** p<0.05, * p<0.1.**Supplementary Material 5** Oxaca-Blinder decomposition of under-five mortality in nine Asian countries: log-linear estimates with CHE per capita

| Variables | **ln(Under-five mortality)** | | | | | | | |
| --- | --- | --- | --- | --- | --- | --- | --- | --- |
| Overall | Endowments | Coefficients | Interaction | Overall | Endowments | Coefficients | Interaction |
|  |  |  |  |  |  |  |  |  |
| CHE per capita |  | -1.125*** | 4.751 | 1.892 |  | -0.473** | 1.353 | 0.539 |
|  |  | (0.176) | (2.959) | (1.182) |  | (0.228) | (2.883) | (1.149) |
| Regulatory quality [1; 6] |  | -1.402*** | 5.051** | 3.181** |  |  |  |  |
|  |  | (0.228) | (2.371) | (1.499) |  |  |  |  |
| Regulatory quality* CHE pc |  | 2.855*** | -4.343** | -5.374** |  |  |  |  |
|  |  | (0.460) | (1.742) | (2.164) |  |  |  |  |
| Control of corruption [1; 6] |  |  |  |  |  | -0.524 | 1.681 | 1.333 |
|  |  |  |  |  |  | (0.407) | (1.778) | (1.412) |
| Control of corruption* CHE pc |  |  |  |  |  | 1.219 | -1.581 | -2.340 |
|  |  |  |  |  |  | (0.777) | (1.348) | (1.999) |
| ln(Unsafe water drinking) |  | -0.443*** | 0.785 | -0.567 |  | -0.473*** | -0.804 | 0.581 |
|  |  | (0.0810) | (2.386) | (1.724) |  | (0.0944) | (2.068) | (1.494) |
| ln(CO2 per capita) |  | -0.133 | 0.141 | 0.275 |  | 0.0877 | 0.297 | 0.580 |
|  |  | (0.0974) | (0.318) | (0.619) |  | (0.106) | (0.293) | (0.570) |
| ln(Animal protein consum. pc) |  | -1.434 | 31.48 | 4.782 |  | -2.373** | 47.92 | 7.278 |
|  |  | (1.005) | (78.41) | (11.91) |  | (1.182) | (83.31) | (12.66) |
| ln(Animal protein consum. pc)Sq |  | 1.325 | -14.55 | -4.590 |  | 2.434* | -22.45 | -7.080 |
|  |  | (1.115) | (35.10) | (11.07) |  | (1.312) | (37.30) | (11.77) |
| ln(Plant protein consum. pc) |  | 0.571 | -85.80 | -1.550 |  | 2.012** | -62.22 | -1.124 |
|  |  | (0.637) | (324.3) | (5.874) |  | (0.908) | (359.5) | (6.501) |
| (ln(Plant protein consum. pc))Sq |  | -0.547 | 42.48 | 1.519 |  | -1.972** | 32.15 | 1.150 |
|  |  | (0.627) | (156.4) | (5.611) |  | (0.901) | (173.3) | (6.207) |
| ln(Carbohydrates consum. pc) |  | 0.574 | -128.1 | -0.221 |  | 0.0315 | -30.95 | -0.0534 |
|  |  | (0.923) | (548.3) | (1.004) |  | (0.315) | (619.0) | (1.070) |
| (ln(Carbohydrates consum. pc))Sq |  | -0.608 | 69.61 | 0.246 |  | -0.0515 | 18.65 | 0.0658 |
|  |  | (0.954) | (271.8) | (1.027) |  | (0.328) | (306.6) | (1.086) |
| ln(Fat consumption pc) |  | -0.0596 | 50.68 | 2.840 |  | -0.391 | 18.93 | 1.061 |
|  |  | (1.974) | (198.5) | (11.13) |  | (2.453) | (206.0) | (11.55) |
| (ln(Fat consumption pc))Sq |  | 0.268 | -27.17 | -3.091 |  | 0.535 | -12.03 | -1.368 |
|  |  | (2.051) | (94.45) | (10.75) |  | (2.546) | (98.23) | (11.18) |
| ln(GDP per capita) |  | -0.537*** | -2.274 | -0.366 |  | -0.870*** | -1.754 | -0.282 |
|  |  | (0.126) | (3.604) | (0.580) |  | (0.164) | (5.183) | (0.834) |
| Unemployment |  | -0.0344*** | 0.144* | 0.0333* |  | -0.0458*** | 0.202** | 0.0467** |
|  |  | (0.0107) | (0.0769) | (0.0197) |  | (0.0136) | (0.0840) | (0.0227) |
| ln(Population density) |  | 0.389*** | -5.295 | -0.884 |  | 0.441*** | -4.973 | -0.830 |
|  |  | (0.0467) | (3.591) | (0.602) |  | (0.0533) | (3.813) | (0.639) |
| Urbanization |  | -0.628*** | -0.336 | -0.290 |  | -0.551*** | -0.139 | -0.120 |
|  |  | (0.0758) | (0.662) | (0.573) |  | (0.0860) | (0.657) | (0.568) |
| OECD group | 1.383*** |  |  |  | 1.383*** |  |  |  |
|  | (0.0456) |  |  |  | (0.0456) |  |  |  |
| Non-OECD group | 3.342*** |  |  |  | 3.342*** |  |  |  |
|  | (0.0727) |  |  |  | (0.0727) |  |  |  |
| Difference | -1.959*** |  |  |  | -1.959*** |  |  |  |
|  | (0.0858) |  |  |  | (0.0858) |  |  |  |
| Endowments | -0.969*** |  |  |  | -0.964*** |  |  |  |
|  | (0.136) |  |  |  | (0.205) |  |  |  |
| Coefficients | 1.174 |  |  |  | -0.432 |  |  |  |
|  | (2.284) |  |  |  | (1.813) |  |  |  |
| Interaction | -2.164 |  |  |  | -0.564 |  |  |  |
|  | (2.288) |  |  |  | (1.824) |  |  |  |
| Constant |  |  | 63.87 |  |  |  | 15.28 |  |
|  |  |  | (188.8) |  |  |  | (201.6) |  |
| Observations | 162 | 162 | 162 | 162 | 162 | 162 | 162 | 162 |

Standard errors in parentheses. *** <0.01, ** p<0.05, * p<0.1.**Supplementary Material 6** Oxaca-Blinder decomposition of healthy life expectancy in nine Asian countries: log-linear estimates with CHE per capita

| Variables | **ln(Healthy life expectancy)** | | | | | | | |
| --- | --- | --- | --- | --- | --- | --- | --- | --- |
| Overall | Endowments | Coefficients | Interaction | Overall | Endowments | Coefficients | Interaction |
|  |  |  |  |  |  |  |  |  |
| CHE per capita |  | -0.0205 | 0.0552 | 0.0220 |  | 0.0887** | -0.241* | -0.0958* |
|  |  | (0.0309) | (0.126) | (0.0503) |  | (0.0351) | (0.124) | (0.0494) |
| Regulatory quality [1; 6] |  | -0.0504 | -0.00693 | -0.00436 |  |  |  |  |
|  |  | (0.0404) | (0.102) | (0.0644) |  |  |  |  |
| Regulatory quality* CHE pc |  | 0.124 | -0.0362 | -0.0448 |  |  |  |  |
|  |  | (0.0814) | (0.0875) | (0.108) |  |  |  |  |
| Control of corruption [1; 6] |  |  |  |  |  | 0.137** | -0.229** | -0.181** |
|  |  |  |  |  |  | (0.0628) | (0.0946) | (0.0758) |
| Control of corruption* CHE pc |  |  |  |  |  | -0.200* | 0.182** | 0.269** |
|  |  |  |  |  |  | (0.119) | (0.0890) | (0.133) |
| ln(Unsafe water drinking) |  | 0.0690*** | 0.118 | -0.0849 |  | 0.0635*** | 0.178*** | -0.128*** |
|  |  | (0.0149) | (0.0837) | (0.0605) |  | (0.0144) | (0.0669) | (0.0484) |
| ln(CO2 per capita) |  | 0.0972*** | -0.0650*** | -0.127*** |  | 0.116*** | -0.0906*** | -0.177*** |
|  |  | (0.0185) | (0.0153) | (0.0281) |  | (0.0172) | (0.0147) | (0.0252) |
| ln(Animal protein consum. pc) |  | 0.354* | -5.341* | -0.811* |  | 0.291 | -4.776* | -0.726* |
|  |  | (0.186) | (2.925) | (0.447) |  | (0.181) | (2.822) | (0.431) |
| ln(Animal protein consum. pc)Sq |  | -0.364* | 2.462* | 0.777* |  | -0.288 | 2.147 | 0.677 |
|  |  | (0.206) | (1.356) | (0.430) |  | (0.201) | (1.309) | (0.415) |
| ln(Plant protein consum. pc) |  | -0.0444 | -22.24* | -0.402 |  | 0.143 | -43.30*** | -0.782** |
|  |  | (0.115) | (12.67) | (0.253) |  | (0.118) | (12.64) | (0.311) |
| (ln(Plant protein consum. pc))Sq |  | 0.0433 | 10.73* | 0.384 |  | -0.143 | 21.11*** | 0.755** |
|  |  | (0.113) | (6.153) | (0.244) |  | (0.117) | (6.141) | (0.303) |
| ln(Carbohydrates consum. pc) |  | 0.156 | -57.41* | -0.0990 |  | 0.0731 | 12.38 | 0.0213 |
|  |  | (0.244) | (34.09) | (0.163) |  | (0.122) | (33.16) | (0.0659) |
| (ln(Carbohydrates consum. pc))Sq |  | -0.158 | 28.44* | 0.100 |  | -0.0729 | -6.440 | -0.0227 |
|  |  | (0.243) | (16.99) | (0.162) |  | (0.120) | (16.54) | (0.0676) |
| ln(Fat consumption pc) |  | 0.125 | -10.81 | -0.606 |  | -0.261 | -4.610 | -0.258 |
|  |  | (0.364) | (9.296) | (0.523) |  | (0.377) | (9.149) | (0.513) |
| (ln(Fat consumption pc))Sq |  | -0.123 | 5.168 | 0.588 |  | 0.268 | 2.068 | 0.235 |
|  |  | (0.378) | (4.583) | (0.523) |  | (0.391) | (4.527) | (0.515) |
| ln(GDP per capita) |  | -0.0213 | 1.051*** | 0.169*** |  | -0.0709*** | 1.600*** | 0.257*** |
|  |  | (0.0228) | (0.186) | (0.0307) |  | (0.0247) | (0.219) | (0.0369) |
| Unemployment |  | 0.00250** | -0.00732 | -0.00169 |  | 0.00109 | -0.000176 | -4.05e-05 |
|  |  | (0.00126) | (0.00532) | (0.00130) |  | (0.00106) | (0.00504) | (0.00116) |
| ln(Population density) |  | 0.0369*** | -0.0630 | -0.0105 |  | 0.0382*** | -0.0194 | -0.00323 |
|  |  | (0.00762) | (0.129) | (0.0216) |  | (0.00732) | (0.124) | (0.0208) |
| Urbanization |  | -0.0124 | 0.00730 | 0.00632 |  | -0.00188 | -0.0134 | -0.0116 |
|  |  | (0.0134) | (0.0272) | (0.0235) |  | (0.0129) | (0.0250) | (0.0216) |
| OECD group | 4.280*** |  |  |  | 4.280*** |  |  |  |
|  | (0.00445) |  |  |  | (0.00445) |  |  |  |
| Non-OECD group | 4.116*** |  |  |  | 4.116*** |  |  |  |
|  | (0.00631) |  |  |  | (0.00631) |  |  |  |
| Difference | 0.164*** |  |  |  | 0.164*** |  |  |  |
|  | (0.00772) |  |  |  | (0.00772) |  |  |  |
| Endowments | 0.214*** |  |  |  | 0.181*** |  |  |  |
|  | (0.0219) |  |  |  | (0.0305) |  |  |  |
| Coefficients | 0.0950 |  |  |  | 0.153*** |  |  |  |
|  | (0.0782) |  |  |  | (0.0569) |  |  |  |
| Interaction | -0.145* |  |  |  | -0.170*** |  |  |  |
|  | (0.0812) |  |  |  | (0.0647) |  |  |  |
| Constant |  |  | 48.04*** |  |  |  | 20.21 |  |
|  |  |  | (15.87) |  |  |  | (15.27) |  |
| Observations | 162 | 162 | 162 | 162 | 162 | 162 | 162 | 162 |

Standard errors in parentheses. *** <0.01, ** p<0.05, * p<0.1.**Appendix** Cross-correlation matrix (full sample)

|  | ln(Healthy life expectancy) | ln(Infant mortality) | ln(Under-five mortality) | ln(Animal protein pc) | ln(Plant protein pc) | ln(Carbohydrates pc) | ln(Fat per capita) | ln(CO2 per capita) | ln(Unsafe water drinking) | CHE as a share of GDP | CHE per capita | Regulatory quality | Control of corruption | ln(GDP per capita) | Unemployment | ln(Population density) | Urbanization |
| --- | --- | --- | --- | --- | --- | --- | --- | --- | --- | --- | --- | --- | --- | --- | --- | --- | --- |
| ln(Healthy life expectancy) | 1.000 |  |  |  |  |  |  |  |  |  |  |  |  |  |  |  |  |
| ln(Infant mortality) | **-0.922** | 1.000 |  |  |  |  |  |  |  |  |  |  |  |  |  |  |  |
| ln(Under-five mortality) | **-0.919** | **0.999** | 1.000 |  |  |  |  |  |  |  |  |  |  |  |  |  |  |
| ln(Animal protein per capita) | **0.813** | **-0.783** | **-0.785** | **1.000** |  |  |  |  |  |  |  |  |  |  |  |  |  |
| ln(Plant protein per capita) | **0.231** | -0.091 | -0.102 | -0.019 | 1.000 |  |  |  |  |  |  |  |  |  |  |  |  |
| ln(Carbohydrates per capita) | **0.319** | **-0.270** | **-0.294** | **0.021** | **0.238** | 1.000 |  |  |  |  |  |  |  |  |  |  |  |
| ln(Fat per capita) | **0.739** | **-0.689** | **-0.698** | **0.885** | **0.304** | -0.062 | 1.000 |  |  |  |  |  |  |  |  |  |  |
| ln(CO2 per capita) | **0.918** | **-0.918** | **-0.926** | **0.782** | **0.285** | **0.349** | **0.791** | 1.000 |  |  |  |  |  |  |  |  |  |
| ln(Unsafe water drinking) | **-0.915** | **0.943** | **0.944** | **-0.822** | **-0.237** | **-0.266** | **-0.741** | **-0.901** | 1.000 |  |  |  |  |  |  |  |  |
| CHE as a share of GDP | **0.774** | **-0.725** | **-0.695** | **0.594** | **0.158** | -0.055 | **0.518** | **0.607** | **-0.712** | 1.000 |  |  |  |  |  |  |  |
| CHE per capita | **0.910** | **-0.969** | **-0.963** | **0.752** | 0.145 | **0.177** | **0.694** | **0.880** | **-0.918** | **0.821** | 1.000 |  |  |  |  |  |  |
| Regulatory quality [1;6] | **0.828** | **-0.927** | **-0.921** | **0.726** | -0.102 | **0.249** | **0.576** | **0.828** | **-0.846** | **0.693** | **0.911** | 1.000 |  |  |  |  |  |
| Control of corruption [1; 6] | **0.859** | **-0.883** | **-0.864** | **0.718** | 0.025 | 0.077 | **0.613** | **0.815** | **-0.827** | **0.832** | **0.899** | **0.899** | 1.000 |  |  |  |  |
| ln(GDP per capita) | **0.877** | **-0.933** | **-0.932** | **0.785** | 0.006 | **0.310** | **0.697** | **0.916** | **-0.857** | **0.673** | **0.935** | **0.902** | **0.864** | 1.000 |  |  |  |
| Unemployment | 0.120 | **-0.240** | **-0.232** | -0.070 | **0.415** | 0.008 | 0.017 | **0.142** | **-0.214** | **0.157** | **0.165** | 0.106 | **0.169** | 0.054 | 1.000 |  |  |
| ln(Population density) | **0.258** | **-0.141** | -0.114 | 0.096 | **0.186** | **0.149** | 0.035 | 0.060 | **-0.223** | **0.502** | **0.224** | **0.181** | **0.302** | **0.214** | 0.001 | 1.000 |  |
| Urbanization | **0.789** | **-0.923** | **-0.916** | **0.741** | 0.112 | 0.077 | **0.691** | **0.808** | **-0.888** | **0.702** | **0.928** | **0.870** | **0.849** | **0.852** | **0.338** | **0.240** | 1.000 |

p<0.05, if a coefficient is **bold**.
